# Supplementary material for: Atlastin-1 regulates morphology and function of endoplasmic reticulum in dendrites
Source: PubMed Central journal article supplement (PMC6362286; doi:10.1038/s41467-019-08478-6), 2019-02-04
Supplement: 41467_2019_8478_MOESM1_ESM.pdf [file 41467_2019_8478_MOESM1_ESM.pdf]

**Liu et al. "Atlastin-1 Regulates Morphology and Function of Endoplasmic Reticulum in Dendrites"**

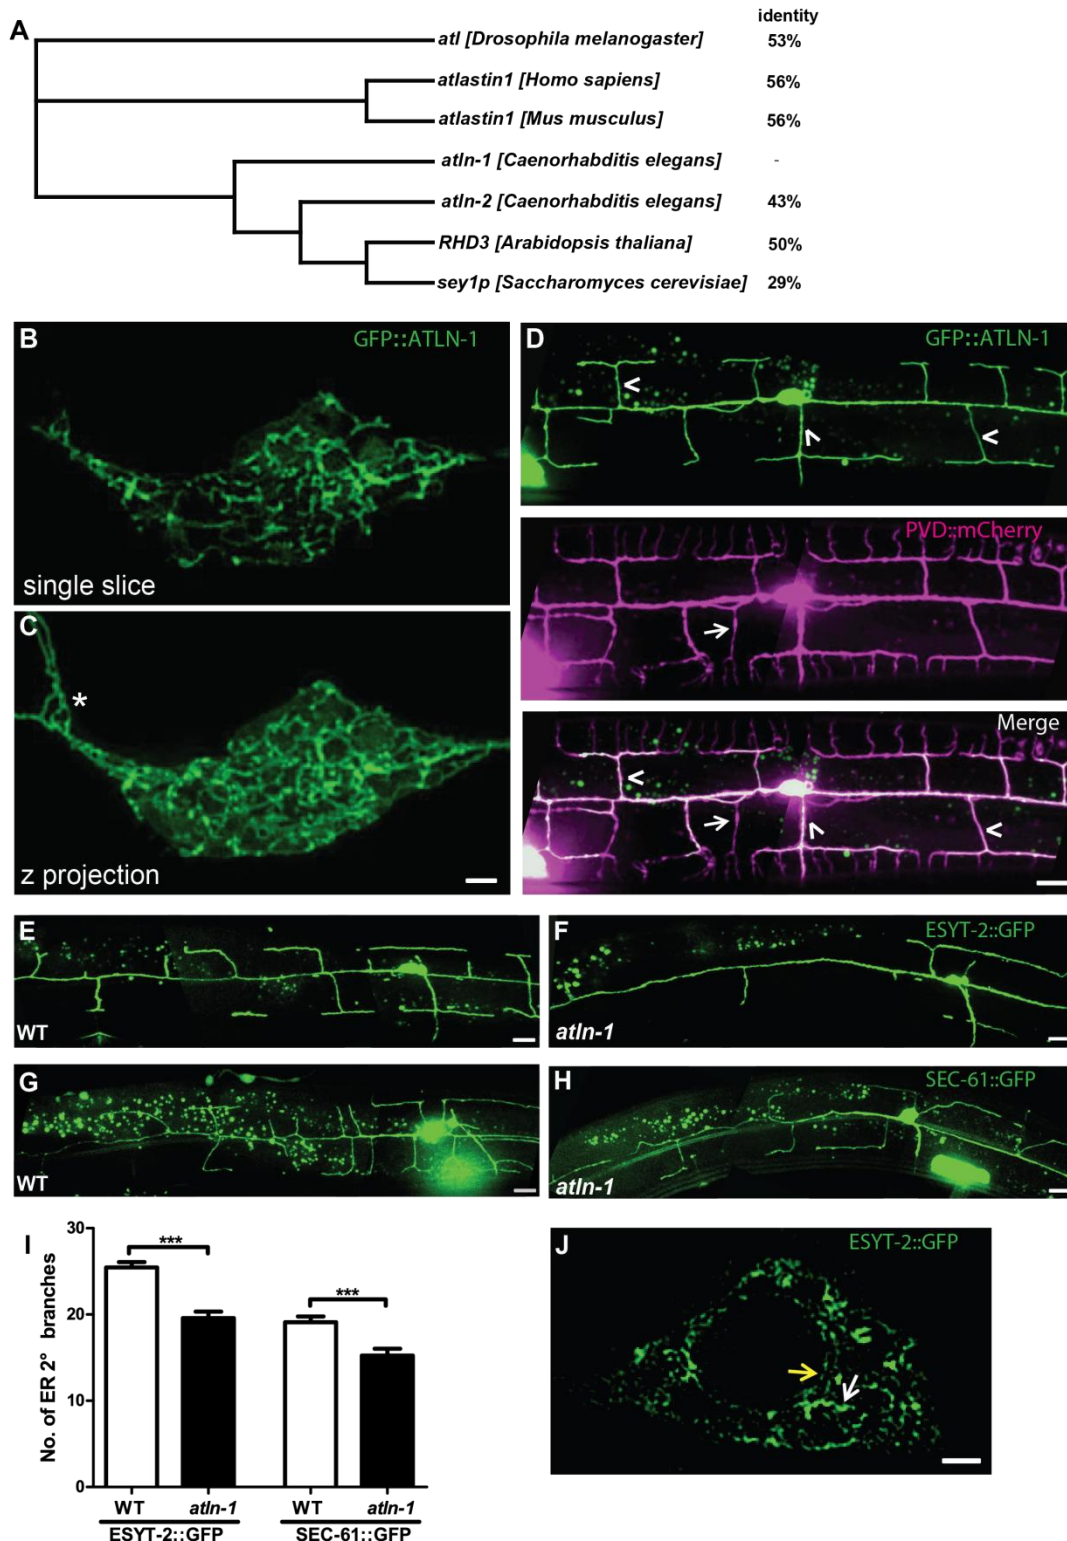

**Supplementary Figure 1. ATLN-1 functions in ER invasion into PVD dendrites.** (A) Phylogenetic tree of Atlastin proteins (created by BioEdit, ClustalW and TreeView software) and protein sequence identity. (B-C) Representative single focal plane (B) and maximum-intensity-projection (C) 3D-SIM image of subcellular GFP::ATLN-1 in PVD soma. Asterisk marks a complex ER network at a PVD dendrite branch point. Scale bar, 1 $\mu$ m. (D) Subcellular distribution of GFP::ATLN-1 in PVD dendrites. Arrows show PVD 2° branches without ER and arrowheads indicate 2° branches with ER. Scale bar, 10 $\mu$ m. (E-H) Representative confocal images of ER

morphology, visualizing by ESYT-2::GFP (E-F) and SEC-61::GFP (G-H) as ER markers in PVD, in WT (E, G) and *atln-1* mutant (F, H). Adult worms are shown. Scale bars, 10 $\mu$ m. (I) Quantification of the number of ER in 2<sup>o</sup> branches. Values are mean and error bars are SEM, n>30. \*\*\*p<0.001 (two-sided student's t test). (J) A representative 3D-SIM image of subcellular ESYT-2::GFP in PVD soma (single focal plane). Yellow arrow indicates the nuclear membrane and white arrow indicates a tubular network. Scale bar, 1 $\mu$ m.

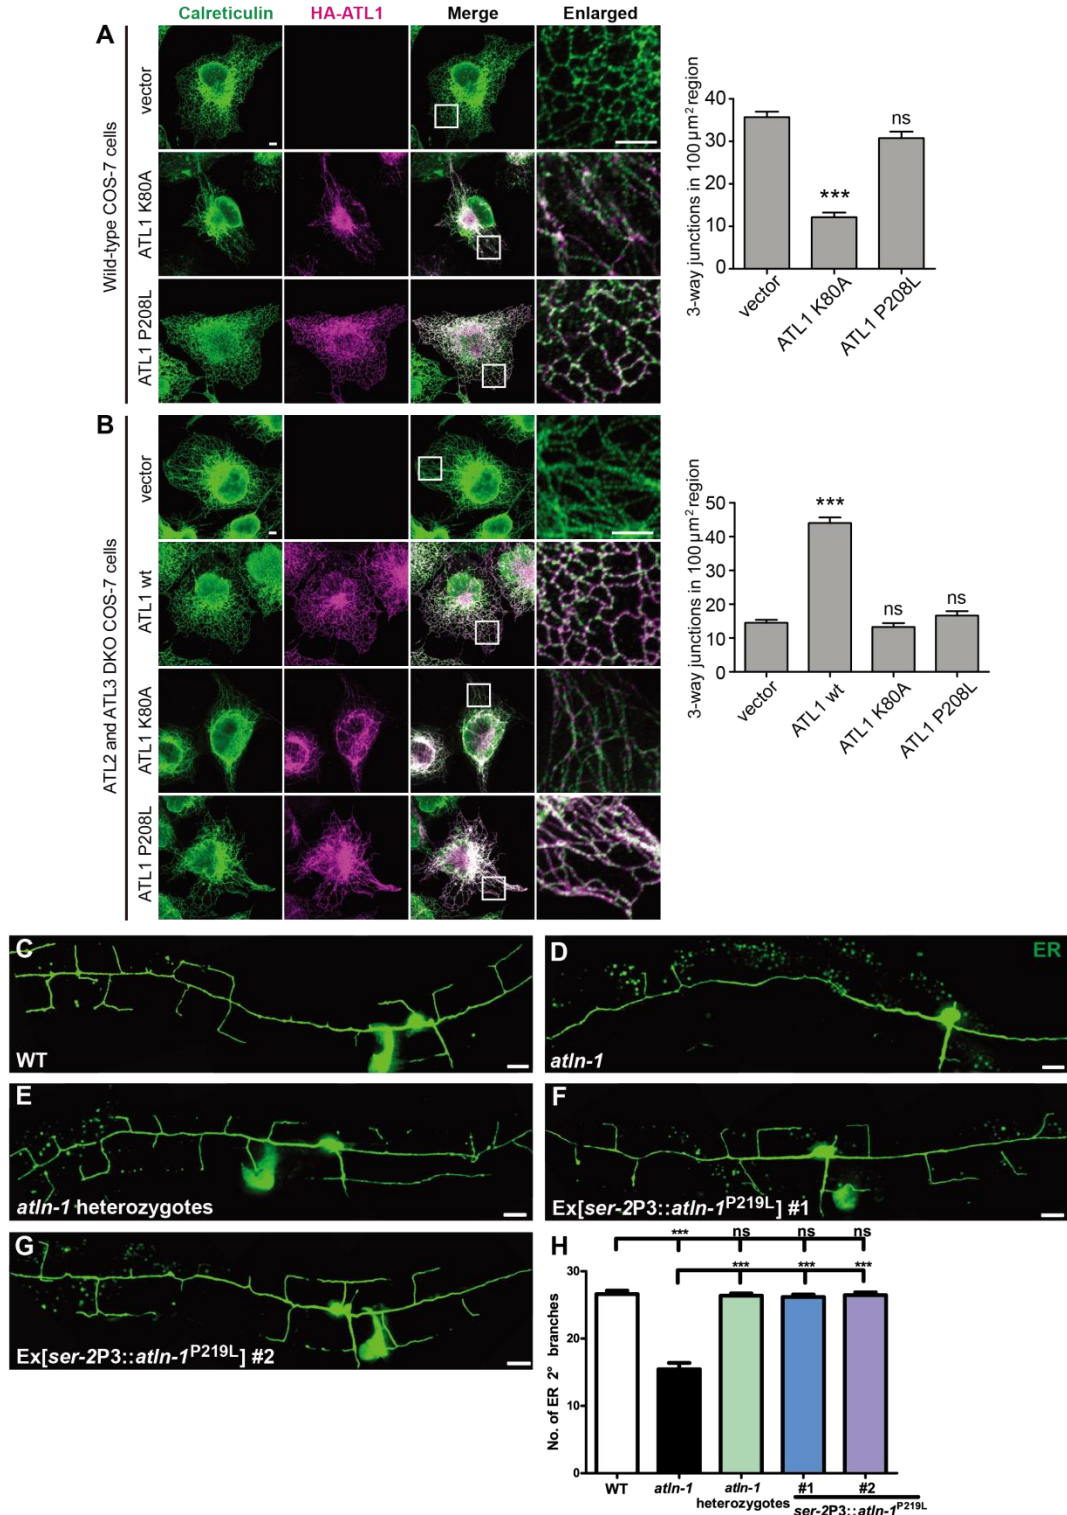

Supplementary Figure 2. *atln-1*(*wy50080*) is a loss-of-function allele. (A) Wild-type COS-7

cells were transfected with vector, HA-ATL1 (K80A) or HA-ATL1 (P208L). 24h after transfection, cells were fixed and stained with anti-calreticulin and anti-HA antibodies. Representative confocal images are shown. The right panel is the quantification of 3-way junctions in a  $100 \mu\text{m}^2$  region away from the nucleus. Scale bars,  $5 \mu\text{m}$ . Values are mean and error bars are SEM, at least 20 different cells per group were examined. ns, not significant; \*\*\* $p < 0.001$  (Newman-Keuls multiple comparison test). (B) ATL2 and ATL3 DKO COS-7 cells were transfected with vector, HA-ATL1 (WT), HA-ATL1 (K80A) or HA-ATL1 (P208L). After 24h, cells were fixed and stained with anti-calreticulin and anti-HA antibodies. Representative confocal images are shown. The right panel is the quantification of 3-way junctions in a  $100 \mu\text{m}^2$  region away from the nucleus. Scale bars,  $5 \mu\text{m}$ . Values are mean and error bars are SEM, at least 20 different cells per group were examined. ns, not significant; \*\*\* $p < 0.001$  (Newman-Keuls multiple comparison test). (C-G) Representative confocal images of ER morphology in PVD in WT (C), *atln-1*<sup>-/-</sup> (D), *atln-1*<sup>+/-</sup> (E), Ex[*ser-2P3::atln-1*<sup>P219L</sup>]#1 (F), and Ex[*ser-2P3::atln-1*<sup>P219L</sup>] #2 (G) worms at adult stage. Scale bars,  $10 \mu\text{m}$ . (H) Quantification of the number of ER in  $2^\circ$  branches. Values are mean and error bars are SEM,  $n=46$  for each genotype. ns, not significant; \*\*\* $p < 0.001$  (Tukey's multiple comparison test).

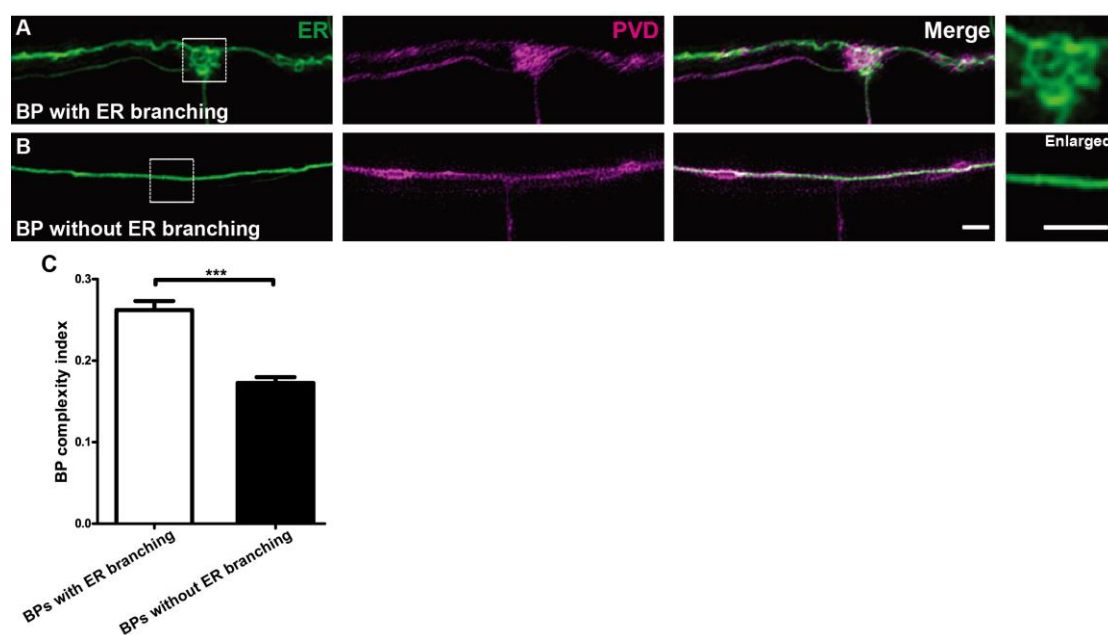

**Supplementary Figure 3. Complex ER networks at dendritic BPs stabilize ER tubules.** (A-B) Representative 3D-SIM images of ER (GFP::SP12) complex structure at BPs with (A) or without ER tubules (B) in  $2^\circ$  branches. Scale bars,  $1 \mu\text{m}$ . (C) Quantification of ER complexity index of BPs with or without ER tubules in  $2^\circ$  branches. Values are mean and error bars are SEM, at least 70 BPs from more than 30 worms are quantified. \*\*\* $p < 0.001$  (two-sided student's t test).

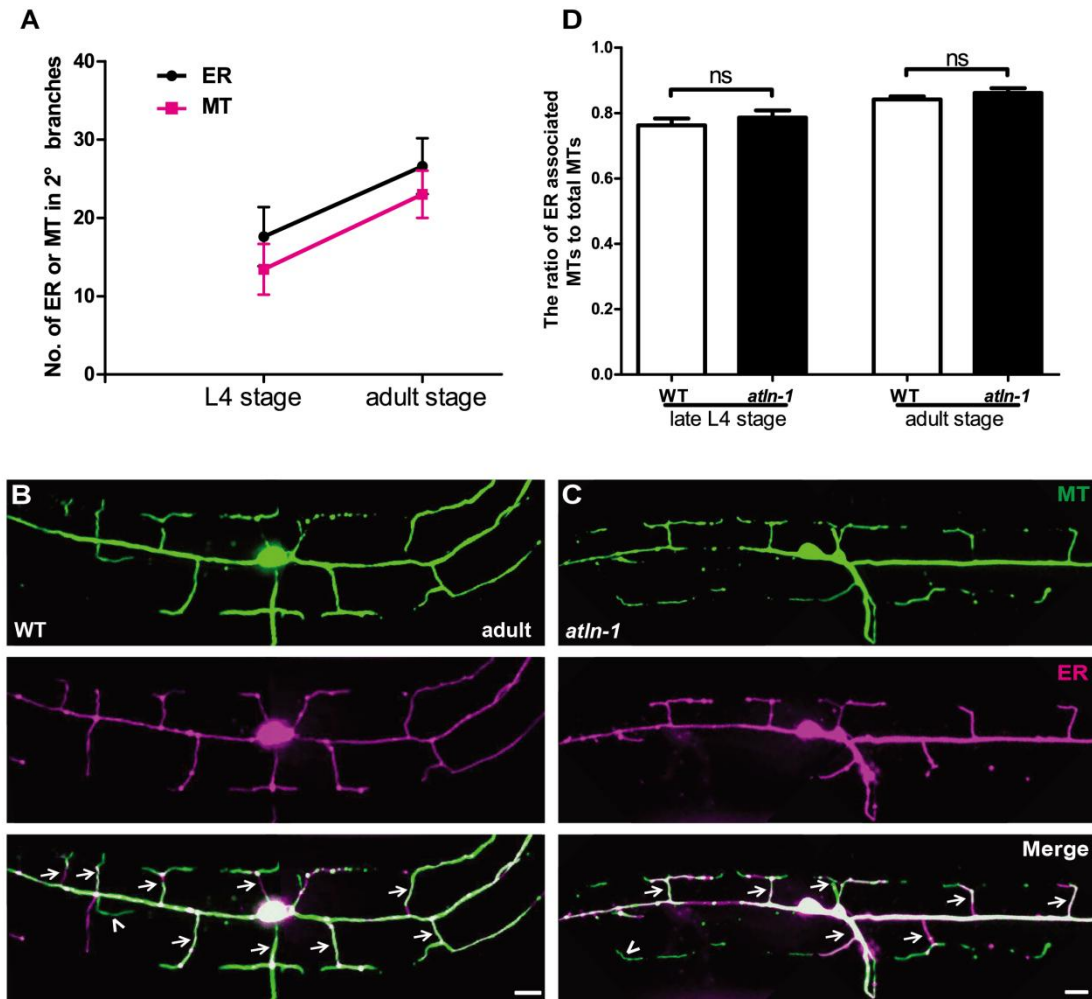

**Supplementary Figure 4. MTs and ER colocalize in dendritic branches.** (A) A line chart showing synchronized increase of ER and MT in dendritic branches. Values are mean and error bars are SD,  $n > 40$  for each genotype at different developmental stages. (B-C) Representative confocal images of MT (TBA-1::GFP) and ER (mCherry::SP12) morphology of PVD neuron in WT (B) and *atln-1* (C) worms at adult stage. Arrows point to MTs in 2° branches which are colocalized with ER and arrowheads point to MTs in 2° branches which are not colocalized with ER. Scale bars, 10  $\mu$ m. (D) Quantification of the percentage of MTs which are colocalized with ER in 2° branches. Values are mean and error bars are SEM,  $n > 30$ . ns, not significant (two-sided student's t test).



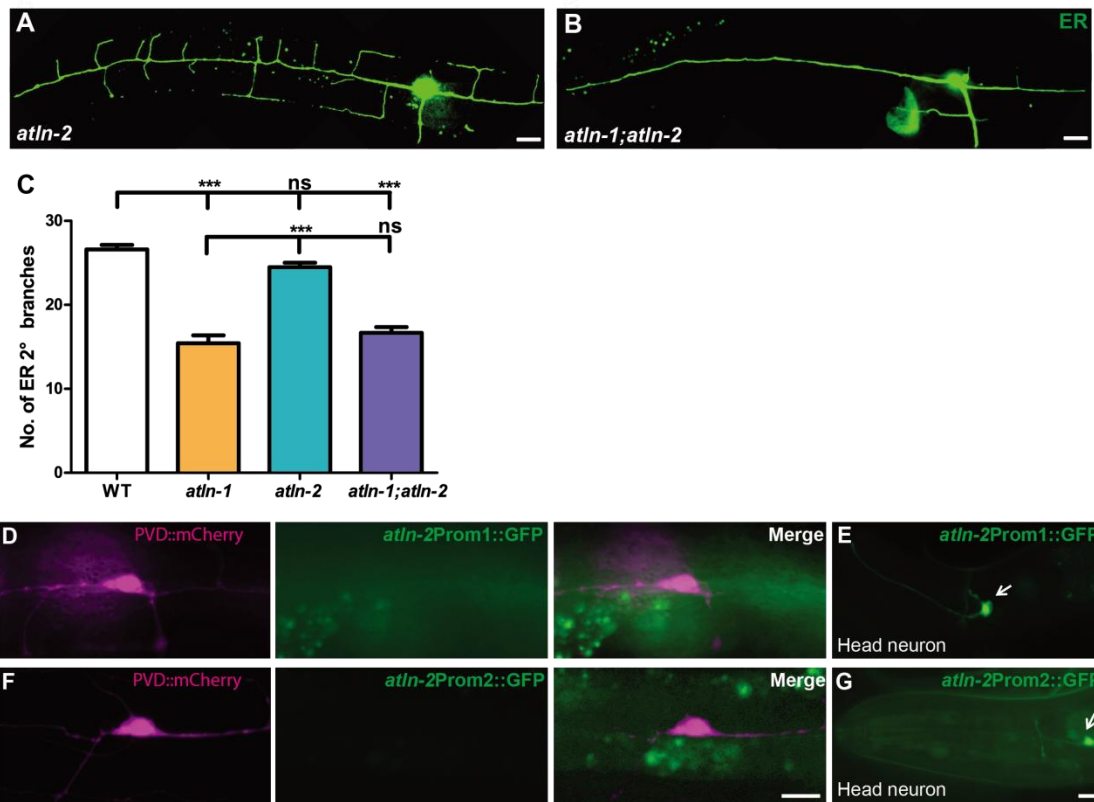

**Supplementary Figure 5. *atln-1* but not *atln-2* affects ER morphogenesis in PVD.** (A and B) Representative confocal images of ER (GFP::SP12) morphology in PVD in *atln-2(wy50125)* (A) and *atln-1; atln-2* double mutants (B) worms at adult stage. Scale bars, 10 $\mu$ m. (C) Quantification of the number of ER in 2° branches. Values are mean and error bars are SEM, n=46 for each genotype. ns, not significant; \*\*\*p<0.001 (Tukey's multiple comparison test). (D-G) Images of transgenic worms expression PVD::mCherry together with *atln-2Prom1::GFP* (D) and *atln-2Prom2::GFP* (F). Head region fluorescence in the same transgenic animals (E and G). Scale bars, 10 $\mu$ m.

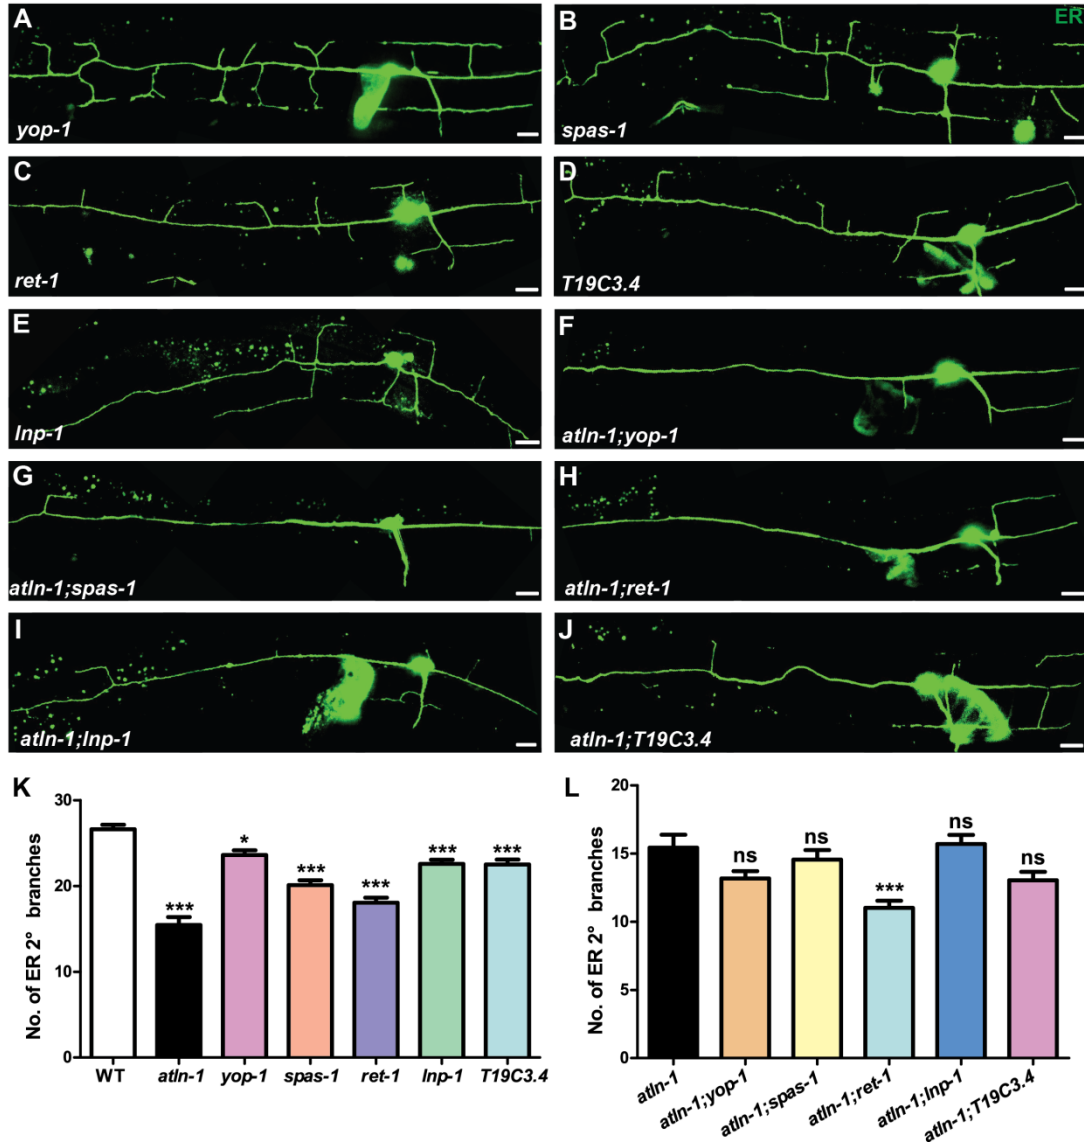

**Supplementary Figure 6. Multiple ER shaping and HSP related genes affect ER extension.** (A-J) Representative confocal images of ER morphology in PVD in *yop-1(tm3667)* (A), *spas-1(tm683)* (B), *ret-1(tm390)* (C), *T19C3.4(wy50209)* (D), *lnp-1(wy50227)* (E), *atln-1; yop-1* (F), *atln-1; spas-1* (G), *atln-1; ret-1* (H), *atln-1; lnp-1* (I), and *atln-1; T19C3.4(wy50209)* (J) worms at adult stage. Scale bars, 10µm. (K-L) Quantification of ER 2° branches number. Values are mean and error bars are SEM, n=46 for each genotype. ns, not significant; \*p<0.05; \*\*\*p<0.001 (Tukey's multiple comparison test).

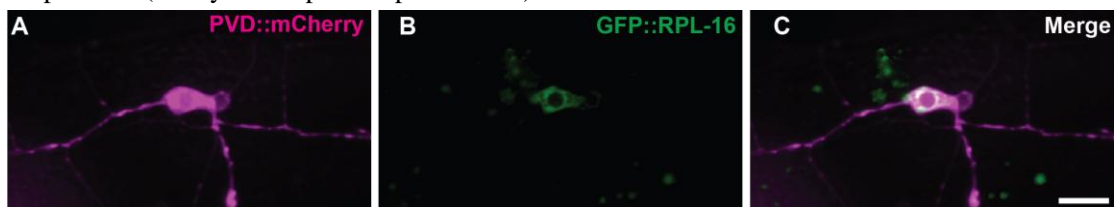

**Supplementary Figure 7. Almost all ribosomes are located in PVD soma.** (A-C) Ribosomes distribution in PVD (A) at adult stage, visualized by GFP::RPL-16 (large ribosomal subunit protein) as ribosome marker (B), and merged image (C). Scale bar, 10µm.

**Supplementary Table 1. Mutant Alleles Used in This Study**

| Allele                  | Reference (sources)    |
|-------------------------|------------------------|
| <i>atln-1(wy50080)</i>  | EMS screen             |
| <i>tba-1(ok1135)</i>    | From CGC               |
| <i>ire-1(ok799)</i>     | (Xing Wei et al.,1998) |
| <i>atln-2(wy50125)</i>  | cas9 editing           |
| <i>yop-1(tm3667)</i>    | From CGC               |
| <i>spas-1(tm683)</i>    | From CGC               |
| <i>ret-1(tm390)</i>     | From CGC               |
| <i>T19C3.4(wy50209)</i> | cas9 editing           |
| <i>lnp-1(wy50227)</i>   | cas9 editing           |

**Supplementary Table 2. Integrated Transgenes Used in This Study**

| Allele            | Chromosome | Constructs                                            | Co-injection marker     |
|-------------------|------------|-------------------------------------------------------|-------------------------|
| <i>wyIs500057</i> | X          | pXM122(10ng/ul),pOL036(25ng/ul)                       | <i>Podr-1::GFP</i>      |
| <i>wyIs592</i>    | III        | pOL020(20ng/ul)                                       | <i>Podr-1::RFP</i>      |
| <i>wyIs706</i>    | X          | <i>Pdes2::GFP-gsgs::TBA-1</i>                         | <i>ser-2P3::mCherry</i> |
| <i>wyIs50070</i>  | ?          | pXM190(10ng/ul), <i>ser-2P3::GFP::TBA-1</i> (15ng/ul) | <i>Podr-1::RFP</i>      |
| <i>wyIs50054</i>  | II         | pXM289(20ng/ul),pOL036(5ng/ul)                        | <i>Podr-1::GFP</i>      |
| <i>wyIs740</i>    | V          | pXD300(10ng/ul),                                      | <i>Podr-1::GFP</i>      |

**Supplementary Table 3. Extrachromosomal Arrays Used in This Study**

| Allele           | Constructs                       | Co-injection marker                                           |
|------------------|----------------------------------|---------------------------------------------------------------|
| <i>wyEx50684</i> | pXM317(10ng/ul)                  | <i>Pmyo-2::RFP</i> (1ng/ul)                                   |
| <i>wyEx50685</i> | pXM341(10ng/ul)                  | <i>Pmyo-2::RFP</i> (1ng/ul)                                   |
| <i>wyEx50686</i> | pXZ26 (20ng/ul)                  | <i>Pmyo-2::RFP</i> (2ng/ul)                                   |
| <i>wyEx50687</i> | pXM341(30ng/ul)                  | <i>Pmyo-2::RFP</i> (1.5ng/ul)                                 |
| <i>wyEx50688</i> | pXM401(25ng/ul)                  | <i>Podr-1::RFP</i> (50ng/ul)                                  |
| <i>wyEx50689</i> | pXM402(25ng/ul)                  | <i>Pmyo-2::RFP</i> (1.5ng/ul)                                 |
| <i>wyEx50690</i> | pXM403 (25ng/ul)                 | <i>Pmyo-2::RFP</i> (1.5ng/ul)                                 |
| <i>wyEx50257</i> | pXM173( 2ng/ul),pOL036(5ng/ul)   | <i>Podr-1::RFP</i> (50ng/ul)                                  |
| <i>wyEx50649</i> | pXM477 (5ng/ul),pOL036 (10ng/ul) | <i>Podr-1::RFP</i> (50ng/ul)                                  |
| <i>wyEx50313</i> | pXM199( 5ng/ul),pOL036(20ng/ul)  | <i>Podr-1::RFP</i> (50ng/ul)+<br><i>Podr-1::GFP</i> (50ng/ul) |



**Supplementary Table 4. Plasmid Used in This Study**

| <b>Plasmid</b> | <b>Genotype</b>                            |
|----------------|--------------------------------------------|
| pXM122         | <i>ser-2P3(1.6k)::GFP::C34B2.10 (SP12)</i> |
| pOL036         | <i>ser-2Prom3::mCherry</i>                 |
| pOL020         | <i>ser-2Prom3::GFP</i>                     |
| pXM190         | <i>ser-2P3(1.6k)::mCherry::C34B2.10</i>    |
| pXM289         | <i>ser-2P3(1.6)::TOMM-20(1-54aa)::GFP</i>  |
| pXD300         | <i>ser-2Prom3::DMA-1::GFP::DMA-1_cyto</i>  |
| pXM317         | <i>ser-2P3::ATLN-1</i>                     |
| pXM341         | <i>ser-2P3::ATLN-1K80A</i>                 |
| pXZ26          | <i>ser-2P3::YOP-1</i>                      |
| pXM401         | <i>ser-2P3::ATLN-1F161S</i>                |
| pXM402         | <i>ser-2P3::ATLN-1FI326S</i>               |
| pXM403         | <i>ser-2P3::ATLN-1S530N</i>                |
| pXM173         | <i>ser-2P3::GFP::ATLN-1</i>                |
| pXM199         | <i>ser-2P3::ESYT-2::GFP</i>                |
| pXM477         | <i>ser-2P3::SEC-61::GFP</i>                |

**Supplementary Methods****Cloning and plasmids**

The plasmid encoding HA-ATL1 was generated by cloning full-length human ATL1 amplified from Myc-ATL1<sup>1</sup> into pcDNA4/TO (Invitrogen) and an HA tag was inserted by PCR. The construct encoding HA-ATL1 K80A and HA-ATL1 P208L were generated using the QuikChange Site-Directed Mutagenesis Kit (Stratagene).

**Cell culture**

COS-7 cells were obtained from ATCC (CRL-1651). Cells were cultured in DMEM containing 10% fetal bovine serum (10099-141, Gibco), at 37 °C and 5% CO<sub>2</sub>. ATL2 and ATL3 DKO cells were generated using a CRISPR/Cas9 genome-editing strategy<sup>2</sup>. sgRNAs (ATL2: 5'-GACGAGATCTTAACATAGTAGTGG-3', ATL3: 5'-GTTTT CACTGTGGAGAAGCCAGG-3') containing oligonucleotides were introduced into the pX330 vector. CRISPR/Cas9 plasmids were transiently transfected into COS7 cells along with pLKO.1-puro at 1:1:1 ratio using TurboFect transfection reagent (Thermo). 24 hours after transfection, cells were treated with 1 µg/ml puromycin to select for cells expressing the sgRNAs. The cells were then sorted for single cell into

a 96 well plate by a BD FACS Aria-II sorter. Single clones were verified by immunoblotting and sequencing using gene-specific primers:

ATL2-Fw: 5'-GTGAGAATTATGAAGATG-3',

ATL2-Rev: 5'-CTTGTTATACATGTATCTAAGC-3',

ATL3-Fw: 5'-ATTGGTTGGGTGACCCAGAAG-3',

ATL3-Rev: 5'-ACACAGTACATGCTGAAGTTC-3'.

Cells used in this study were not further authenticated after obtaining from the source. All cell lines were routinely tested and found negative for mycoplasma using a PCR-based method.

### **Immunofluorescence and confocal microscopy**

For immunofluorescence experiments, cells were seeded on coverslips and transfected using Lipofectamine 3000 (Invitrogen) based on the manufacturer's instructions. 24 h after transfection, the cells were fixed in 4% paraformaldehyde (PFA) followed by permeabilization with 0.1% Triton X-100/PBS for 10 minutes. Cells were blocked in blocking solution (3% BSA in PBS) and incubated with anti-calreticulin (Abcam) and anti-HA (Zsbio) antibodies in blocking solution for 1 h at room temperature. Cells were washed in PBS, and then incubated with fluorophore-conjugated secondary antibodies (Thermo) for an additional 1 h. Cells were then washed and mounted on slides using mounting medium (KPL). Imaging was performed on a Zeiss LSM700 confocal microscope.

### **Quantification**

ER three-way junctions were quantified in a 100  $\mu\text{m}^2$  region away from the nuclear. Quantification was performed using the Cell Counter function of Image J.

### **Supplementary References**

- 1 Rismanchi, N., Soderblom, C., Stadler, J., Zhu, P. P. & Blackstone, C. Atlantin GTPases are required for Golgi apparatus and ER morphogenesis. *Hum Mol Genet* **17**, 1591-1604, doi:10.1093/hmg/ddn046 (2008).
- 2 Sun, S. *et al.* Identification of endoplasmic reticulum-shaping proteins in Plasmodium parasites. *Protein & cell* **7**, 615-620, doi:10.1007/s13238-016-0290-5 (2016).
